# Supplementary material
Source: PubMed Central journal article supplement (PMC6128499)
Supplement: jamadermatol-154-554-s001.pdf [file jamadermatol-154-554-s001.pdf]

## Supplementary Online Content

Heckman CJ, Handorf E, Auerback MV. Prevalence and correlates of skin cancer screening among indoor tanners and nontanners. *JAMA Dermatol*. Published online April 4, 2018. doi:10.1001/jamadermatol.2018.0163

**eTable 1.** Participant characteristics

**eTable 2.** Univariable and multivariable logistic regression analyses examining correlates of skin cancer screening by indoor tanning status

This supplementary material has been provided by the authors to give readers additional information about their work.

**eTable 1. Participant characteristics**

| <b>Variable</b>                                                              | <b>Full Sample %<sup>a</sup></b> |
|------------------------------------------------------------------------------|----------------------------------|
| Internet use                                                                 |                                  |
| Yes                                                                          | 77.19                            |
| Missing                                                                      | 1.63                             |
| Email use                                                                    |                                  |
| Yes                                                                          | 68.15                            |
| Missing                                                                      | 1.86                             |
| Worried about monthly bills                                                  |                                  |
| Very worried                                                                 | 10.07                            |
| Moderately worried                                                           | 18.39                            |
| Not too worried                                                              | 27.25                            |
| Not worried at all                                                           | 44.14                            |
| Worried about paying medical bills if sick or accident                       |                                  |
| Very worried                                                                 | 14.94                            |
| Somewhat worried                                                             | 30.98                            |
| Not at all worried                                                           | 53.88                            |
| Looked up health info on internet in past 12 months                          | 50.88                            |
| Available place to go when sick or need health advice                        |                                  |
| Clinic/doctor's office                                                       | 82.21                            |
| Hospital                                                                     | 1.93                             |
| Other/no usual place                                                         | 14.18                            |
| Usual place to go for routine/preventative healthcare                        |                                  |
| No routine/preventative care                                                 | 9.13                             |
| Outpatient doctor's office or clinic                                         | 86.27                            |
| Hospital                                                                     | 2.00                             |
| Other/no usual place                                                         | 2.54                             |
| Emergency department visit in past 12 months                                 | 18.71                            |
| Ever had cancer (other than skin)                                            | 5.88                             |
| History of melanoma in first-degree relative                                 | 2.36                             |
| Missing                                                                      | 1.34                             |
| History of non-melanoma or unknown skin cancer type in first-degree relative | 4.70                             |
| Missing                                                                      | 1.34                             |
| Sun protection scale (shade, clothing, sunscreen)                            |                                  |
| 1-1.9 (always)                                                               | 3.36                             |
| 2-2.9 (most of the time)                                                     | 15.24                            |
| 3-3.9 (sometimes)                                                            | 41.59                            |
| 4-5 (rarely, never)                                                          | 32.86                            |
| Don't go out in the sun                                                      | 6.84                             |
| Sun protection factor used most often                                        |                                  |
| 1-14                                                                         | 35.05                            |
| 15-29                                                                        | 9.18                             |
| 30-49                                                                        | 28.24                            |
| 50+                                                                          | 16.99                            |
| Don't go out in the sun                                                      | 5.09                             |
| Missing                                                                      | 5.45                             |
| Number of sunburns in past 12 months                                         |                                  |
| 0                                                                            | 65.38                            |
| 1                                                                            | 16.32                            |
| 2+                                                                           | 17.94                            |

**eTable 1. Continued**

| <b>Variable</b>                                         | <b>Full Sample %</b> |
|---------------------------------------------------------|----------------------|
| Skin's reaction to 1 hour of sun exposure               |                      |
| Severe sunburn with blisters                            | 7.38                 |
| Moderate sunburn with peeling                           | 21.66                |
| Burn mildly with some or no darkening/tanning           | 23.12                |
| Turn darker without sunburn                             | 24.67                |
| Nothing would happen                                    | 15.41                |
| Do not go out in the sun                                | 6.78                 |
| Skin's reaction to repeated sun exposure over 2 weeks   |                      |
| Very dark or deeply tanned                              | 12.40                |
| Dark/moderately tanned                                  | 30.26                |
| A little dark/mildly tanned                             | 30.41                |
| Freckled but still light skinned                        | 5.24                 |
| Burned repeatedly, little or no darkening/tanning       | 11.55                |
| Don't go out in the sun                                 | 8.08                 |
| Missing                                                 | 2.07                 |
| Self-applied sunless tanners in past 12 months          | 5.17                 |
| Spray tanning at salon/other business in past 12 months | 1.71                 |

<sup>a</sup> Missing data are reported only when  $\geq 1\%$  of responses were missing.

**eTable 2. Univariable and multivariable logistic regression analyses examining correlates of skin cancer screening by indoor tanning status<sup>a, b</sup>**

| Variable                                                            | Ever Indoor Tanners     |                                                | Non-Tanners             |                                                |
|---------------------------------------------------------------------|-------------------------|------------------------------------------------|-------------------------|------------------------------------------------|
|                                                                     | % Screened <sup>c</sup> | OR (95% CI) <sup>d</sup><br><i>MV adjusted</i> | % Screened <sup>c</sup> | OR (95% CI) <sup>d</sup><br><i>MV adjusted</i> |
| Sex                                                                 |                         |                                                |                         |                                                |
| Female                                                              | 31.13                   | 1.13 (0.86-1.43)                               | <b>21.14</b>            | 1.02 (0.92-1.12)                               |
| Male                                                                | 27.65                   | ref                                            | <b>18.03</b>            | ref                                            |
| Employment status                                                   |                         |                                                |                         |                                                |
| Working                                                             | 30.08                   | ref                                            | <b>22.02</b>            | ref                                            |
| Not working                                                         | 30.47                   | 0.97 (0.77-1.21)                               | <b>17.84</b>            | 0.96 (0.85-1.09)                               |
| Family member with health insurance                                 |                         |                                                |                         |                                                |
| Yes                                                                 | <b>30.86</b>            | ref                                            | <b>20.13</b>            | ref                                            |
| No                                                                  | <b>11.73</b>            | 0.59 (0.24-1.42)                               | <b>7.16</b>             | 0.87 (0.62-1.21)                               |
| Sexual orientation                                                  |                         |                                                |                         |                                                |
| Heterosexual                                                        | 29.99                   | ref                                            | 19.53                   | ref                                            |
| Not Heterosexual                                                    | 33.00                   | 1.65 (1.00-2.73)                               | 19.87                   | 1.16 (0.87-1.53)                               |
| Marital status                                                      |                         |                                                |                         |                                                |
| Married or living with partner                                      | <b>32.46</b>            | ref                                            | <b>22.20</b>            | ref                                            |
| Widowed/divorced/separated                                          | <b>28.86</b>            | 1.03 (0.82-1.29)                               | <b>22.93</b>            | 1.06 (0.94-1.18)                               |
| Never married                                                       | <b>22.00</b>            | 1.15 (0.84-1.55)                               | <b>10.39</b>            | 1.03 (0.87-1.21)                               |
| Internet use                                                        |                         |                                                |                         |                                                |
| Yes                                                                 | 30.83                   | ref                                            | <b>20.79</b>            | ref                                            |
| No                                                                  | 21.05                   | 0.76 (0.49-1.18)                               | <b>15.47</b>            | 1.11 (0.92-1.34)                               |
| Worried about monthly bills                                         |                         |                                                |                         |                                                |
| Very worried                                                        | <b>17.39</b>            | ref                                            | <b>12.07</b>            | ref                                            |
| Moderately worried                                                  | <b>27.49</b>            | 1.49 (0.99-2.25)                               | <b>14.75</b>            | 0.95 (0.77-1.18)                               |
| Not too worried                                                     | <b>30.58</b>            | 1.49 (0.98-2.28)                               | <b>18.06</b>            | 0.92 (0.74-1.13)                               |
| Not worried at all                                                  | <b>33.19</b>            | 1.43 (0.94-2.16)                               | <b>24.20</b>            | 1.04 (0.84-1.30)                               |
| Availability of a place to go when sick or in need of health advice |                         |                                                |                         |                                                |
| Clinic/doctor's office                                              | <b>32.72</b>            | ref                                            | <b>22.00</b>            | ref                                            |
| Hospital                                                            | <b>19.80</b>            | 2.14 (0.49-9.34)                               | <b>10.62</b>            | 1.09 (0.64-1.85)                               |
| Other/no usual place                                                | <b>16.31</b>            | 0.67 (0.47-0.96)                               | <b>8.12</b>             | 0.80 (0.62-1.02)                               |
| Number of sunburns in past 12 months                                |                         |                                                |                         |                                                |
| 0                                                                   | 30.81                   | ref                                            | <b>22.84</b>            | ref                                            |
| 1                                                                   | 33.15                   | 0.80 (0.62-1.03)                               | <b>20.59</b>            | 0.92 (0.77-1.10)                               |
| 2+                                                                  | 26.72                   | 0.85 (0.67-1.07)                               | <b>18.57</b>            | 0.94 (0.81-1.09)                               |
| Skin's reaction to 1 hour of sun exposure                           |                         |                                                |                         |                                                |
| Severe sunburn with blisters                                        | 31.63                   | ref                                            | <b>31.92</b>            | ref                                            |
| Moderate sunburn with peeling                                       | 34.21                   | 1.33 (0.93-1.89)                               | <b>25.40</b>            | 0.90 (0.74-1.09)                               |
| Burn mildly with some or no darkening/tanning                       | 29.93                   | 1.07 (0.76-1.52)                               | <b>22.77</b>            | 0.82 (0.68-1.00)                               |
| Turn darker without sunburn                                         | 25.50                   | 1.19 (0.80-1.78)                               | <b>14.43</b>            | 0.79 (0.64-0.97)                               |
| Nothing would happen                                                | 24.62                   | 1.27 (0.78-2.06)                               | <b>12.12</b>            | 0.80 (0.64-1.00)                               |
| Do not go out in the sun                                            | 31.78                   | 1.92 (0.71-5.17)                               | <b>16.94</b>            | 0.70 (0.54-1.46)                               |

eTable 2. Continued

| Variable                                              | Ever Indoor Tanners     |                                                | Non-Tanners             |                                                |
|-------------------------------------------------------|-------------------------|------------------------------------------------|-------------------------|------------------------------------------------|
|                                                       | % Screened <sup>c</sup> | OR (95% CI) <sup>d</sup><br><i>MV adjusted</i> | % Screened <sup>c</sup> | OR (95% CI) <sup>d</sup><br><i>MV adjusted</i> |
| Skin's reaction to repeated sun exposure over 2 weeks |                         |                                                |                         |                                                |
| Very dark or deeply tanned                            | <b>24.85</b>            | ref                                            | <b>14.02</b>            | ref                                            |
| Dark/moderately tanned                                | <b>27.84</b>            | 0.94 (0.67-1.32)                               | <b>19.34</b>            | 1.06 (0.90-1.25)                               |
| A little dark/mildly tanned                           | <b>30.65</b>            | 0.95 (0.67-1.35)                               | <b>17.60</b>            | 0.86 (0.72-1.03)                               |
| Freckled but still light skinned                      | <b>30.67</b>            | 0.87 (0.54-1.40)                               | <b>28.60</b>            | 1.15 (0.89-1.48)                               |
| Burned repeatedly with little or no darkening/tanning | <b>39.30</b>            | 1.28 (0.86-1.88)                               | <b>29.13</b>            | 1.10 (0.90-1.34)                               |
| Don't go out in the sun                               | <b>27.09</b>            | 0.54 (0.20-1.46)                               | <b>18.20</b>            | 1.09 (0.79-1.49)                               |

<sup>a</sup> OR = odds ratio, CI = confidence interval, ref = reference group.

<sup>b</sup> A separate category for missing data was included for each categorical variable with missing data. These categories are not reported in the table.

<sup>c</sup> Associations with skin cancer screening significant at  $p < 0.01$  in unadjusted univariable models are denoted using bold font (i.e., the proportion of individuals who were screened differed significantly among categories within a variable).

<sup>d</sup> Associations with skin cancer screening significant at  $p < 0.01$  in adjusted multivariable models are also denoted using bold font. This table only presents variables found to not have significant associations in indoor tanners or non-tanners in the multivariable analyses. Results for significant variables are presented in Table 2. Significant variables included: age, race, ethnicity, email use, worry about paying medical bills, looking up health information online, having a usual place to go for routine healthcare, emergency department visits, cancer history, family skin cancer history, sun protection and SPF use, and sunless tanning (self-applied and professional).
